# Supplementary material for: Variation for Photoperiod and Temperature Sensitivity in the Global Mini Core Collection of Sorghum
Source: Front Plant Sci. 2021 Jun 29;12:571243. doi: 10.3389/fpls.2021.571243 (PMC8276039; doi:10.3389/fpls.2021.571243)
Supplement: Supplementary file 2 [file Table_2.XLSX]

## Sheet: Sheet1
Table S2. Photo and temperature sensitivity grouping of sorghum mini core accessions using data on days to 50% flowering (DFL) and cumulative growing degree days (CGDD) of two rainy and two postrainy seasons evaluated at ICRISAT, Hyderabad, India
Accession number	Origin	Race	Days to 50% flowering in rainy	Days to 50% flowering in postrainy	Cumulative growing degree days in rainy	Cumulative growing degree days in postrainy	Sensitivity Group	Sensitivity subgroup
IS 11619	Ethiopia	Durra-bicolor	82.7822	87.1476	1369.38	1041.41	PTINS
IS 12697	Australia	Bicolor	76.3126	72.3736	1267.56	868.758	PTINS
IS 12937	Ethiopia	Kafir	68.917	69.1429	1151.14	829.53	PTINS
IS 14290	Botswana	Kafir-durra	66.7561	69.4711	1120.39	832.674	PTINS
IS 17941	India	Caudatum	59.6085	57.3778	1009.06	716.81	PTINS
IS 20743	United States of America	Bicolor	66.7561	63.0714	1121.62	769.961	PTINS
IS 21645	Malawi	Guinea	68.0859	65.2046	1141	791.317	PTINS
IS 24348	India	Caudatum	59.4422	56.0153	1006.35	711.099	PTINS
IS 2864	South Africa	Caudatum	60.6058	57.7087	1024.68	727.757	PTINS
IS 29239	Swaziland	Kafir	67.9196	71.2236	1139.95	855.637	PTINS
IS 29568	Lesotho	Kafir-caudatum	63.4316	66.6815	1069.48	806.105	PTINS
IS 29714	Zimbabwe	Kafir-durra	81.55	78.4523	1350.02	941.359	PTINS
IS 4060	India	Durra-bicolor	57.2813	61.3488	970.891	752.625	PTINS
IS 4581	India	Durra	72.0752	75.0022	1201.03	893.226	PTINS
IS 4631	India	Durra	74.2361	71.7165	1233.41	856.712	PTINS
IS 473	United States of America	Guinea-kafir	63.6932	65.9664	1073.56	798.856	PTINS
IS 5094	India	Durra	73.5639	76.1522	1223.06	905.37	PTINS
IS 7131	Uganda	Durra-caudatum	83.895	80.588	1386.35	968.568	PTINS
IS 1004	India	Durra	93.1856	83.5833	1538.78	1007.31	PSTINS	Subgroup 3
IS 10302	Thailand	Caudatum	80.2202	69.2522	1328.21	830.176	PSTINS	Subgroup 3
IS 1041	India	Durra	91.6896	63.7278	1514.78	776.136	PSTINS	Subgroup 3
IS 10757	Chad	Caudatum	132.843	71.1121	2143.38	852.823	PSTINS	Subgroup 3
IS 10867	Chad	Guinea-caudatum	134.696	77.7951	2172.69	942.639	PSTINS	Subgroup 3
IS 10969	United States of America	Guinea-caudatum	86.3891	65.2046	1427.75	791.194	PSTINS	Subgroup 3
IS 11026	Ethiopia	Durra	102.328	84.8352	1683.59	1023.69	PSTINS	Subgroup 3
IS 11473	Ethiopia	Caudatum	90.6923	66.7879	1497.63	807.209	PSTINS	Subgroup 3
IS 11919	Ethiopia	Durra-bicolor	123.179	79.1094	2007.9	951.427	PSTINS	Subgroup 3
IS 12302	Zimbabwe	Caudatum	67.0885	84.5048	1127.15	1014.44	PSTINS	Subgroup 2
IS 1233	China	Bicolor	45.6457	54.0687	780.963	689.793	PSTINS	Subgroup 2
IS 12447	Sudan	Durra-caudatum	65.7587	70.9454	1106.21	849.461	PSTINS	Subgroup 2
IS 12706	United States of America	Caudatum-bicolor	44.3159	53.7377	756.483	685.279	PSTINS	Subgroup 2
IS 12735	Yemen	Caudatum-bicolor	51.4635	64.056	874.527	779.609	PSTINS	Subgroup 2
IS 12804	Turkey	Bicolor	59.9409	70.2379	1014.44	841.065	PSTINS	Subgroup 2
IS 12883	India	Durra	58.4449	66.1892	990.676	801.425	PSTINS	Subgroup 2
IS 12945	Nicaragua	Kafir	65.925	81.2451	1108.43	980.072	PSTINS	Subgroup 2
IS 12965	Cuba	Caudatum	68.917	57.7087	1151.41	727.079	PSTINS	Subgroup 3
IS 13294	Venezuela (Bolivarian Republic of)	Caudatum-bicolor	142.878	100.857	2282.05	1208.03	PSTINS	Subgroup 3
IS 13549	Mexico	Caudatum-bicolor	137.337	88.9644	2204.23	1063.36	PSTINS	Subgroup 3
IS 13782	South Africa	Kafir-durra	54.788	69.1429	929.394	829.423	PSTINS	Subgroup 2
IS 13893	South Africa	Kafir-caudatum	69.7481	91.8321	1167.84	1096.22	PSTINS	Subgroup 2
IS 13919	South Africa	Kafir-caudatum	62.4343	77.6308	1053.53	932.875	PSTINS	Subgroup 2
IS 13971	South Africa	Caudatum	64.7614	76.9737	1089.36	924.193	PSTINS	Subgroup 2
IS 14010	South Africa	Caudatum-bicolor	60.6058	69.9634	1025.54	838.783	PSTINS	Subgroup 2
IS 14090	Argentina	Caudatum	61.2707	67.3379	1035.44	812.985	PSTINS	Subgroup 2
IS 14779	Cameroon	Caudatum	106.133	63.3343	1740.39	774.674	PSTINS	Subgroup 3
IS 14861	Cameroon	Caudatum	101.164	58.2051	1664.8	732.709	PSTINS	Subgroup 3
IS 15170	Cameroon	Caudatum	101.546	61.7586	1671.2	761.069	PSTINS	Subgroup 3
IS 15466	Cameroon	Caudatum	147.856	81.2451	2349.61	979.186	PSTINS	Subgroup 3
IS 15478	Cameroon	Guinea-caudatum	123.438	67.3379	2011.35	812.156	PSTINS	Subgroup 3
IS 15744	Cameroon	Durra-caudatum	148.252	73.8522	2355.55	880.647	PSTINS	Subgroup 3
IS 15931	Cameroon	Guinea	134.742	73.8522	2173.2	889.558	PSTINS	Subgroup 3
IS 15945	Cameroon	Guinea-caudatum	129.865	71.9325	2102.72	864.458	PSTINS	Subgroup 3
IS 16382	Cameroon	Guinea	124.133	59.5288	2022.56	741.183	PSTINS	Subgroup 3
IS 16528	Cameroon	Guinea	140.061	81.0808	2247.55	978.275	PSTINS	Subgroup 3
IS 17980	India	Durra	91.8558	66.1892	1516.99	801.211	PSTINS	Subgroup 3
IS 18039	India	Durra-bicolor	90.0274	76.7419	1487.82	915.517	PSTINS	Subgroup 3
IS 19153	Sudan	Guinea-caudatum	77.2282	69.7993	1280.21	835.975	PSTINS	Subgroup 3
IS 19262	Sudan	Guinea-caudatum	48.3053	61.8452	822.551	758.321	PSTINS	Subgroup 2
IS 19389	Bangladesh	Caudatum	61.6032	77.9594	1041.41	937.15	PSTINS	Subgroup 2
IS 19445	Botswana	Kafir	54.6218	70.7839	926.469	847.667	PSTINS	Subgroup 2
IS 19450	Botswana	Guinea-kafir	57.2813	65.8162	970.95	797.608	PSTINS	Subgroup 2
IS 19859	India	Durra	82.7135	65.6969	1367.55	796.392	PSTINS	Subgroup 3
IS 19975	Senegal	Guinea	108.049	83.3809	1773.13	1005.19	PSTINS	Subgroup 3
IS 20195	Niger	Bicolor	105.652	66.3533	1733.08	802.09	PSTINS	Subgroup 3
IS 20298	Niger	Caudatum-bicolor	88.3284	53.5723	1459.95	678.102	PSTINS	Subgroup 3
IS 20625	United States of America	Durra-caudatum	129.921	80.2594	2104.57	964.867	PSTINS	Subgroup 3
IS 20632	United States of America	Caudatum	127.261	81.5737	2064.59	984.544	PSTINS	Subgroup 3
IS 20679	United States of America	Guinea-caudatum	78.0155	62.7432	1292.57	768.475	PSTINS	Subgroup 3
IS 20697	United States of America	Caudatum	57.78	67.502	978.977	813.347	PSTINS	Subgroup 2
IS 20713	United States of America	Guinea-caudatum	75.2335	64.3842	1249.25	782.778	PSTINS	Subgroup 3
IS 20740	United States of America	Bicolor	78.3917	65.8162	1299.75	797.757	PSTINS	Subgroup 3
IS 20816	United States of America	Bicolor	59.276	71.0593	1003.79	851.083	PSTINS	Subgroup 2
IS 20956	Indonesia	Durra-caudatum	79.3891	71.8808	1314.48	864.655	PSTINS	Subgroup 3
IS 21083	Kenya	Caudatum	108.274	76.8094	1776.39	921.682	PSTINS	Subgroup 3
IS 21512	Malawi	Guinea	71.7428	65.3687	1195.25	792.787	PSTINS	Subgroup 3
IS 21863	Syrian Arab Republic	Bicolor	51.1311	61.9227	869.043	760.626	PSTINS	Subgroup 2
IS 22239	Botswana	Kafir	61.7694	73.6879	1043.84	886.801	PSTINS	Subgroup 2
IS 22294	Botswana	Kafir	67.2548	76.9737	1128.25	925.703	PSTINS	Subgroup 2
IS 22609	Sri Lanka	Caudatum	116.789	87.488	1907.48	1045.51	PSTINS	Subgroup 3
IS 22720	Somalia	Durra	78.8904	67.8302	1307.59	816.688	PSTINS	Subgroup 3
IS 22799	Somalia	Durra	75.8984	66.295	1261.6	802.458	PSTINS	Subgroup 3
IS 22986	Sudan	Caudatum	118.902	64.2201	1940.67	787.27	PSTINS	Subgroup 3
IS 23216	Zambia	Caudatum-bicolor	117.454	83.7094	1920.03	1001.75	PSTINS	Subgroup 3
IS 23514	Ethiopia	Caudatum	74.9242	68.6506	1243.31	825.523	PSTINS	Subgroup 3
IS 23521	Ethiopia	Guinea-caudatum	79.5553	72.5889	1317.84	872.045	PSTINS	Subgroup 3
IS 23579	Ethiopia	Guinea-caudatum	77.2282	66.6815	1280.22	805.891	PSTINS	Subgroup 3
IS 23586	Ethiopia	Guinea-caudatum	80.8851	73.0308	1339.32	874.419	PSTINS	Subgroup 3
IS 23590	Ethiopia	Guinea-caudatum	82.0486	72.2607	1358.09	866.018	PSTINS	Subgroup 3
IS 23644	Gambia	Guinea	108.581	75.3785	1779.16	912.301	PSTINS	Subgroup 3
IS 23684	Mozambique	Guinea	102.494	95.7363	1686.05	1145.78	PSTINS	Subgroup 3
IS 2379	South Africa	Caudatum	66.2574	58.0397	1111.7	728.162	PSTINS	Subgroup 3
IS 2382	South Africa	Caudatum	67.0885	74.3451	1126.15	892.635	PSTINS	Subgroup 2
IS 2389	South Africa	Kafir	55.9516	67.6363	949.004	814.672	PSTINS	Subgroup 2
IS 23891	Yemen	Durra	98.5899	75.2144	1623.21	908.779	PSTINS	Subgroup 3
IS 2397	South Africa	Kafir	59.1098	65.6969	1001.72	795.825	PSTINS	Subgroup 2
IS 23992	Yemen	Caudatum	65.925	59.8597	1107.94	743.547	PSTINS	Subgroup 3
IS 2413	Iran (Islamic Republic of)	Bicolor	75.3997	70.0736	1253.35	838.997	PSTINS	Subgroup 3
IS 24139	United Republic of Tanzania	Guinea	122.441	92.8303	1996.28	1113.57	PSTINS	Subgroup 3
IS 24175	United Republic of Tanzania	Guinea	132.082	97.4886	2135.58	1165.51	PSTINS	Subgroup 3
IS 24218	United Republic of Tanzania	Guinea	143.385	100.317	2289.47	1201.79	PSTINS	Subgroup 3
IS 2426	Afghanistan	Caudatum-bicolor	59.7747	75.0022	1012.36	897.329	PSTINS	Subgroup 2
IS 24453	South Africa	Caudatum-bicolor	63.7641	75.8237	1073.95	912.927	PSTINS	Subgroup 2
IS 24462	South Africa	Caudatum-bicolor	53.6244	62.3416	909.925	766.068	PSTINS	Subgroup 2
IS 24463	South Africa	Kafir	56.1178	69.745	951.589	835.788	PSTINS	Subgroup 2
IS 24492	South Africa	Kafir	59.4422	76.6451	1006.7	930.232	PSTINS	Subgroup 2
IS 24939	Zambia	Bicolor	125.274	82.8532	2032.95	993.774	PSTINS	Subgroup 3
IS 24953	Zambia	Guinea-caudatum	125.267	81.697	2033.46	985.801	PSTINS	Subgroup 3
IS 25089	Ghana	Guinea	105.346	67.9672	1731.42	817.028	PSTINS	Subgroup 3
IS 25249	Ethiopia	Durra-bicolor	128.105	91.7723	2074.66	1095.16	PSTINS	Subgroup 3
IS 25301	Ethiopia	Durra-bicolor	124.615	87.4779	2026.45	1046.89	PSTINS	Subgroup 3
IS 25548	Rwanda	Caudatum	112.592	79.5498	1842.02	954.629	PSTINS	Subgroup 3
IS 25732	Mali	Durra	110.159	68.595	1804.51	824.367	PSTINS	Subgroup 3
IS 25836	Mali	Durra	122.104	69.1429	1988.53	829.366	PSTINS	Subgroup 3
IS 25910	Mali	Guinea	100.858	75.0022	1659.85	896.689	PSTINS	Subgroup 3
IS 25989	Mali	Guinea	114.961	99.8656	1878.68	1196.17	PSTINS	Subgroup 3
IS 26025	Mali	Guinea	104.489	79.2194	1717.4	954.811	PSTINS	Subgroup 3
IS 26046	Mali	Guinea	109.15	75.7067	1790.42	917.425	PSTINS	Subgroup 3
IS 26222	Togo	Guinea-caudatum	109.182	69.6352	1789.67	835.343	PSTINS	Subgroup 3
IS 26484	Benin	Guinea	126.098	68.629	2051.77	838.846	PSTINS	Subgroup 3
IS 26617	Madagascar	Caudatum-bicolor	95.1968	83.8737	1573.49	1011.32	PSTINS	Subgroup 3
IS 26694	South Africa	Caudatum	65.5925	81.8621	1102.4	987.668	PSTINS	Subgroup 2
IS 26737	South Africa	Kafir	59.6085	73.5236	1009.63	883.125	PSTINS	Subgroup 2
IS 26749	South Africa	Kafir	58.1125	67.502	984.959	813.642	PSTINS	Subgroup 2
IS 27034	Sudan	Durra	112.677	88.6341	1844.11	1058.46	PSTINS	Subgroup 3
IS 27557	Burkina Faso	Guinea	89.03	76.199	1471.46	925.176	PSTINS	Subgroup 3
IS 27697	Sierra Leone	Guinea	127.926	93.2426	2076.45	1127.21	PSTINS	Subgroup 3
IS 27786	Morocco	Durra-bicolor	50.9648	59.1331	866.126	738.038	PSTINS	Subgroup 2
IS 27887	South Africa	Caudatum-bicolor	78.2255	84.6952	1297.55	1019.28	PSTINS	Subgroup 2
IS 27912	South Africa	Kafir-caudatum	56.7827	74.0165	962.84	889.878	PSTINS	Subgroup 2
IS 28141	Yemen	Durra-caudatum	102.662	75.3308	1687.82	910.859	PSTINS	Subgroup 3
IS 28313	Yemen	Durra-caudatum	60.6058	53.5723	1025.58	684.65	PSTINS	Subgroup 3
IS 28389	Yemen	Durra-caudatum	52.6271	61.1834	893.904	754.526	PSTINS	Subgroup 2
IS 28449	Yemen	Guinea-caudatum	57.6138	65.5328	976.509	794.454	PSTINS	Subgroup 2
IS 28451	Yemen	Guinea-caudatum	50.6324	63.3996	860.642	772.852	PSTINS	Subgroup 2
IS 2872	Egypt	Caudatum-bicolor	48.3053	60.1177	822.078	742.628	PSTINS	Subgroup 2
IS 28747	Yemen	Durra-caudatum	60.6058	68.1583	1024.99	819.792	PSTINS	Subgroup 2
IS 28849	Yemen	Durra-caudatum	65.0938	53.9032	1095.62	687.469	PSTINS	Subgroup 3
IS 2902	Nigeria	Caudatum-bicolor	122.55	71.7727	1998.92	860.722	PSTINS	Subgroup 3
IS 29091	Yemen	Durra-caudatum	102.674	70.895	1688.43	848.277	PSTINS	Subgroup 3
IS 29100	Yemen	Durra-caudatum	101.237	73.2453	1666.72	879.18	PSTINS	Subgroup 3
IS 29187	Swaziland	Guinea-caudatum	64.9276	79.1094	1092.74	951.427	PSTINS	Subgroup 2
IS 29233	Swaziland	Kafir	64.7614	81.3666	1089.13	980.984	PSTINS	Subgroup 2
IS 29241	Swaziland	Kafir-caudatum	59.4422	72.8665	1006.82	873.582	PSTINS	Subgroup 2
IS 29269	Swaziland	Guinea-caudatum	57.9462	72.3736	982.275	867.322	PSTINS	Subgroup 2
IS 29304	Swaziland	Guinea-kafir	71.0779	84.8352	1187.03	1022.08	PSTINS	Subgroup 2
IS 29326	Swaziland	Caudatum-bicolor	57.4476	75.3785	973.825	908.254	PSTINS	Subgroup 2
IS 29335	Swaziland	Caudatum	63.2654	80.0453	1065.71	962.155	PSTINS	Subgroup 2
IS 29358	Lesotho	Kafir	61.7694	67.8302	1043.97	816.376	PSTINS	Subgroup 2
IS 29392	Lesotho	Kafir	60.772	67.1164	1027.63	809.482	PSTINS	Subgroup 2
IS 29441	Lesotho	Kafir-caudatum	57.6138	64.2201	976.318	781.456	PSTINS	Subgroup 2
IS 29468	Lesotho	Guinea-caudatum	61.6032	70.0736	1041.24	839.768	PSTINS	Subgroup 2
IS 29519	Lesotho	Kafir-caudatum	59.276	69.307	1004.24	833.61	PSTINS	Subgroup 2
IS 29565	Lesotho	Guinea-caudatum	56.7827	65.861	962.715	797.516	PSTINS	Subgroup 2
IS 29582	Lesotho	Kafir	62.1018	68.9599	1048.82	827.503	PSTINS	Subgroup 2
IS 29606	South Africa	Kafir	62.4343	77.4665	1053.46	936.51	PSTINS	Subgroup 2
IS 29627	South Africa	Durra-caudatum	56.1178	68.9236	951.805	827.238	PSTINS	Subgroup 2
IS 29654	China	Kafir-bicolor	62.1018	68.2665	1047.21	822.282	PSTINS	Subgroup 2
IS 29733	Zimbabwe	Guinea-durra	59.4422	74.8379	1007.06	899.528	PSTINS	Subgroup 2
IS 29772	Zimbabwe	Guinea-caudatum	97.3412	78.1237	1604.34	939.66	PSTINS	Subgroup 3
IS 29914	Zimbabwe	Caudatum	84.3758	68.6506	1395.04	824.094	PSTINS	Subgroup 3
IS 29950	Zimbabwe	Guinea-caudatum	79.8877	67.1738	1325.17	810.374	PSTINS	Subgroup 3
IS 30079	Zimbabwe	Durra-caudatum	84.2096	75.9879	1391.64	909.826	PSTINS	Subgroup 3
IS 30092	Zimbabwe	Durra-caudatum	66.9223	85.661	1124.64	1026.71	PSTINS	Subgroup 2
IS 30231	Zimbabwe	Kafir	66.5899	84.5048	1117.71	1015.57	PSTINS	Subgroup 2
IS 30443	China	Caudatum-bicolor	53.6244	69.4711	910.299	832.789	PSTINS	Subgroup 2
IS 30460	China	Caudatum	54.2893	63.0034	921.093	768.912	PSTINS	Subgroup 2
IS 30533	Republic of Korea	Caudatum-bicolor	63.6859	73.2453	981.469	881.93	PSTINS	Subgroup 2
IS 30536	Republic of Korea	Caudatum-bicolor	49.8013	65.0405	847.056	789.462	PSTINS	Subgroup 2
IS 30562	Republic of Korea	Bicolor	59.276	69.6352	1004.47	835.45	PSTINS	Subgroup 2
IS 30572	Cameroon	Guinea-caudatum	72.2415	60.3561	1203.66	750.74	PSTINS	Subgroup 3
IS 30838	Cameroon	Guinea	127.738	70.7308	2073.79	847.416	PSTINS	Subgroup 3
IS 31043	Uganda	Caudatum	122.94	79.9308	2003.71	959.755	PSTINS	Subgroup 3
IS 31186	Uganda	Guinea-caudatum	123.771	75.4951	2017.17	910.892	PSTINS	Subgroup 3
IS 3121	Kenya	Bicolor	82.2619	73.1951	1362.94	882.978	PSTINS	Subgroup 3
IS 31446	Uganda	Guinea-caudatum	127.261	120.115	2066.01	1484.59	PSTINS	Subgroup 3
IS 31557	Burundi	Caudatum	114.461	88.7992	1865.61	1061.56	PSTINS	Subgroup 3
IS 3158	South Africa	Kafir	60.6058	70.2379	1025.04	840.81	PSTINS	Subgroup 2
IS 31651	Zaire	Caudatum	106.317	70.2916	1746.37	841.46	PSTINS	Subgroup 3
IS 31681	Algeria	Bicolor	53.1257	66.5174	902.023	805.128	PSTINS	Subgroup 2
IS 31706	Yemen	Durra	108.348	74.1808	1781.8	893.234	PSTINS	Subgroup 3
IS 31714	Yemen	Durra-caudatum	109.26	64.7123	1795.3	786.202	PSTINS	Subgroup 3
IS 32245	Yemen	Durra-caudatum	62.268	51.2565	1051.78	658.338	PSTINS	Subgroup 3
IS 32349	India	Guinea	102.494	86.3217	1686.07	1034.11	PSTINS	Subgroup 3
IS 32439	India	Guinea	101.663	76.9737	1672.68	922.659	PSTINS	Subgroup 3
IS 32787	Somalia	Durra	89.6949	63.8919	1482.47	777.86	PSTINS	Subgroup 3
IS 33023	United Republic of Tanzania	Guinea	134.088	92.433	2162.41	1102.6	PSTINS	Subgroup 3
IS 33090	Honduras	Durra	82.7822	92.5981	1369.38	1107.62	PSTINS	Subgroup 2
IS 33353	Kenya	Caudatum	111.47	74.0165	1826.01	895.639	PSTINS	Subgroup 3
IS 3971	India	Durra	57.78	68.9788	979.359	827.379	PSTINS	Subgroup 2
IS 4092	India	Caudatum	83.8771	68.6506	1386.91	825.104	PSTINS	Subgroup 3
IS 4360	India	Durra	86.038	68.595	1422.31	825.368	PSTINS	Subgroup 3
IS 4372	India	Guinea-durra	87.3678	67.0097	1444.2	809.619	PSTINS	Subgroup 3
IS 4515	India	Durra	69.5819	74.6736	1162.32	891.462	PSTINS	Subgroup 2
IS 4613	India	Durra	80.2202	75.1665	1328.42	896.311	PSTINS	Subgroup 3
IS 4698	India	Durra	70.413	78.2256	1174.73	935.244	PSTINS	Subgroup 2
IS 4951	India	Guinea	100.666	82.8532	1656.74	999.664	PSTINS	Subgroup 3
IS 5295	India	Guinea	102.993	80.7523	1694	971.202	PSTINS	Subgroup 3
IS 5301	India	Guinea-caudatum	113.964	76.1522	1863.18	909.506	PSTINS	Subgroup 3
IS 5386	India	Durra	67.0885	73.4385	1125.51	875.224	PSTINS	Subgroup 2
IS 5667	India	Durra	110.14	82.3576	1803.94	993.443	PSTINS	Subgroup 3
IS 5919	India	Durra	89.3625	71.3879	1476.81	854.201	PSTINS	Subgroup 3
IS 602	United States of America	Bicolor	53.7906	65.6969	913.074	797.27	PSTINS	Subgroup 2
IS 603	United States of America	Bicolor	57.2813	69.9634	971.216	838.397	PSTINS	Subgroup 2
IS 608	United States of America	Bicolor	55.6191	73.2453	943.03	879.18	PSTINS	Subgroup 2
IS 6351	India	Durra	104.726	76.3165	1721.24	915.586	PSTINS	Subgroup 3
IS 6354	India	Durra	106.484	73.3594	1749.01	879.884	PSTINS	Subgroup 3
IS 6421	India	Durra	109.309	80.3756	1790.04	969.228	PSTINS	Subgroup 3
IS 7250	Nigeria	Guinea	140.559	85.6809	2252.32	1023.36	PSTINS	Subgroup 3
IS 7305	Nigeria	Caudatum	110.473	72.8665	1810.74	875.347	PSTINS	Subgroup 3
IS 7310	Nigeria	Guinea	131.098	70.4022	2120.17	843.173	PSTINS	Subgroup 3
IS 7679	Nigeria	Guinea	142.135	77.6308	2271.46	935.008	PSTINS	Subgroup 3
IS 7957	Nigeria	Guinea-bicolor	132.996	74.6736	2148.61	903.343	PSTINS	Subgroup 3
IS 7987	Nigeria	Guinea	130.366	75.3308	2106.2	902.113	PSTINS	Subgroup 3
IS 8012	Japan	Bicolor	79.8877	69.307	1323.32	830.729	PSTINS	Subgroup 3
IS 8348	Pakistan	Durra	56.4502	67.1738	956.973	810.998	PSTINS	Subgroup 2
IS 8774	South Africa	Kafir-durra	57.9462	66.7879	981.037	807.119	PSTINS	Subgroup 2
IS 8777	Uganda	Caudatum-bicolor	75.5659	67.8302	1254.43	817.567	PSTINS	Subgroup 3
IS 8916	Uganda	Guinea-caudatum	117.122	75.3308	1914.64	906.1	PSTINS	Subgroup 3
IS 9108	Kenya	Caudatum	77.2282	70.5665	1281.04	844.486	PSTINS	Subgroup 3
IS 9113	Kenya	Caudatum	85.3731	72.7022	1411.23	870.743	PSTINS	Subgroup 3
IS 9177	Kenya	Caudatum	119.229	81.738	1947.15	985.028	PSTINS	Subgroup 3
IS 9745	Sudan	Caudatum	103.081	65.0405	1692.7	789.601	PSTINS	Subgroup 3
IS 995	United States of America	Caudatum-bicolor	62.6005	74.8379	1055.27	900.808	PSTINS	Subgroup 2
IS 1212	China	Kafir-bicolor	46.9755	64.8764	800.506	788.033	PTS
IS 1219	China	Guinea-bicolor	47.1417	63.9962	803.057	778.907	PTS
IS 16151	Cameroon	Caudatum-bicolor	48.139	67.8302	819.419	815.572	PTS
IS 19676	Zimbabwe	Kafir	65.7587	87.6431	1105.58	1048.39	PTS
IS 20727	United States of America	Bicolor	45.9781	65.2046	785.117	791.276	PTS
IS 22616	Myanmar	Bicolor	62.3131	88.1386	1051.92	1053.71	PTS
IS 24503	South Africa	Bicolor	49.3026	73.0308	838.655	879.687	PTS
IS 26701	South Africa	Caudatum-bicolor	60.9383	86.8411	1030.9	1038.72	PTS
IS 28614	Yemen	Durra-caudatum	48.6377	65.861	827.595	797.722	PTS
IS 29314	Swaziland	Durra-caudatum	65.925	91.9985	1109.19	1097	PTS
IS 29689	Zimbabwe	Kafir	66.0912	93.8285	1109.58	1120.92	PTS
IS 30383	China	Caudatum-bicolor	48.139	63.7278	819.477	776.218	PTS
IS 30400	China	Caudatum-bicolor	48.8039	66.3533	830.37	802.886	PTS
IS 30417	China	Caudatum-bicolor	48.9702	64.3271	833.312	782.396	PTS
IS 30450	China	Caudatum-bicolor	47.1417	63.6653	803.19	775.584	PTS
IS 30451	China	Caudatum-bicolor	49.3026	64.658	838.589	785.637	PTS
IS 30466	China	Caudatum-bicolor	45.9781	59.7895	784.619	738.162	PTS
IS 30507	Republic of Korea	Caudatum-bicolor	48.6377	63.6653	827.595	775.551	PTS
IS 30508	Republic of Korea	Caudatum-bicolor	48.6377	66.1892	827.72	801.211	PTS
Controls
IS 2205	India	Durra-bicolor	76.397	80.2356	1267.35	959.887	PTINS
IS 18758	Ethiopia	Guinea-caudatum	77.7717	69.4073	1288.43	833	PSTINS	Subgroup 3
IS 33844	India	Durra	74.5686	77.3297	1238.95	923.917	PTINS
